# Supplementary material for: Effects of axial pyridine coordination on a saddle-distorted porphyrin macrocycle: stabilization of hexa-coordinated high-spin Fe(iii) and air-stable low-spin iron(ii) porphyrinates
Source: Royal Society of Chemistry journal article supplement (doi:10.1039/b924742d), 2010-01-01
Supplement: b924742d.pdf [file b924742d.pdf]

## **Supporting Informations**

### **Effects of Axial Pyridine Coordination on a Saddle-Distorted Porphyrin Macrocycle: Stabilization of Hexa-coordinated High-Spin Fe(III) and Air-stable Low-Spin Iron(II) Porphyrinates**

**Ranjan Patra, Susovan Bhowmik, Sudip Kumar Ghosh and Sankar Prasad Rath\***

*Department of Chemistry, Indian Institute of Technology Kanpur, Kanpur-208016.*

*Email: [sprath@iitk.ac.in](mailto:sprath@iitk.ac.in)*

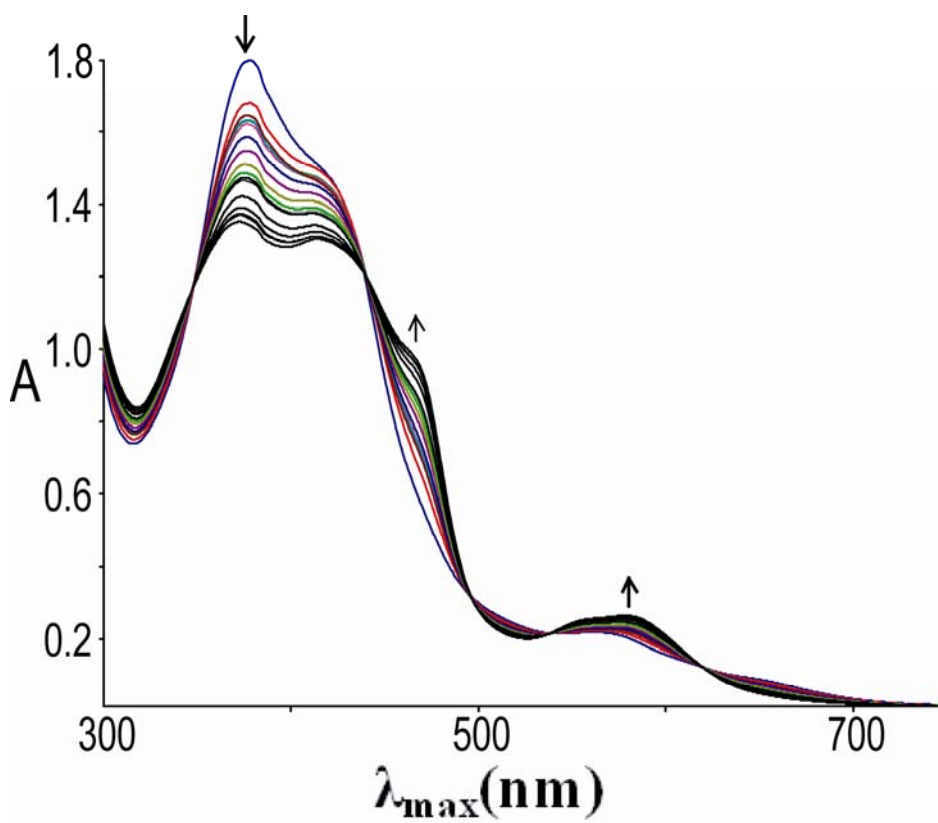

**Figure S1.** Time-evolution spectral changes (at 298K) of  $\text{Fe}^{\text{III}}(\text{tn-OEP})\text{ClO}_4$  in chloroform in presence of excess pyridine in air showing first the appearance of six-coordinated  $\text{Fe}^{\text{III}}(\text{tn-OEP})(\text{py})_2\text{ClO}_4$  which, on longer exposure, again converts to  $\text{Fe}^{\text{II}}(\text{tn-OEP})(\text{py})_2$ . Arrows indicate increase or decrease of band intensity.

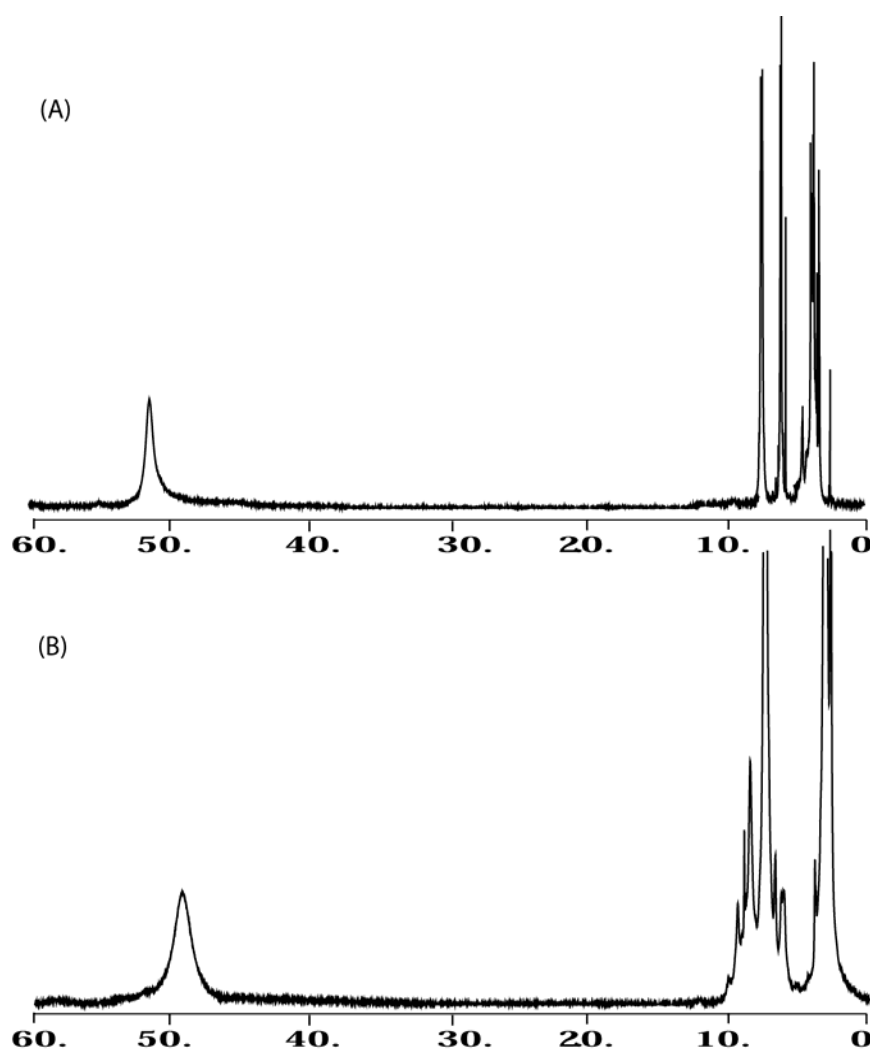

**Figure S2:**  $^1\text{H}$  NMR spectra in  $\text{CDCl}_3$  at 295K for (A) for  $\text{Fe}^{\text{III}}(\text{tn-OEP})(4\text{-CNpy})_2\cdot\text{ClO}_4$  (B) for  $\text{Fe}^{\text{III}}(\text{tn-OEP})(3\text{-Clpy})_2\cdot\text{ClO}_4$ .

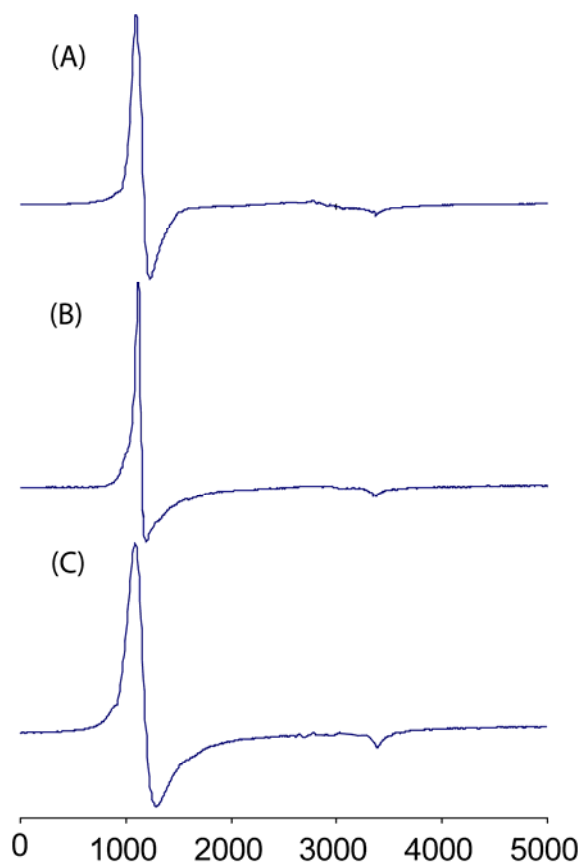

**Figure S3.** X-band EPR spectra of the isolated solid (at 120K) of (A)  $\text{Fe}^{\text{III}}(tn\text{-OEP})(4\text{-CNpy})_2\text{ClO}_4$  ; (B)  $\text{Fe}^{\text{III}}(tn\text{-OEP})(3\text{-Clpy})_2\text{ClO}_4$  and (C)  $\text{Fe}^{\text{III}}(tn\text{-OEP})(\text{py})_2\text{ClO}_4$ .

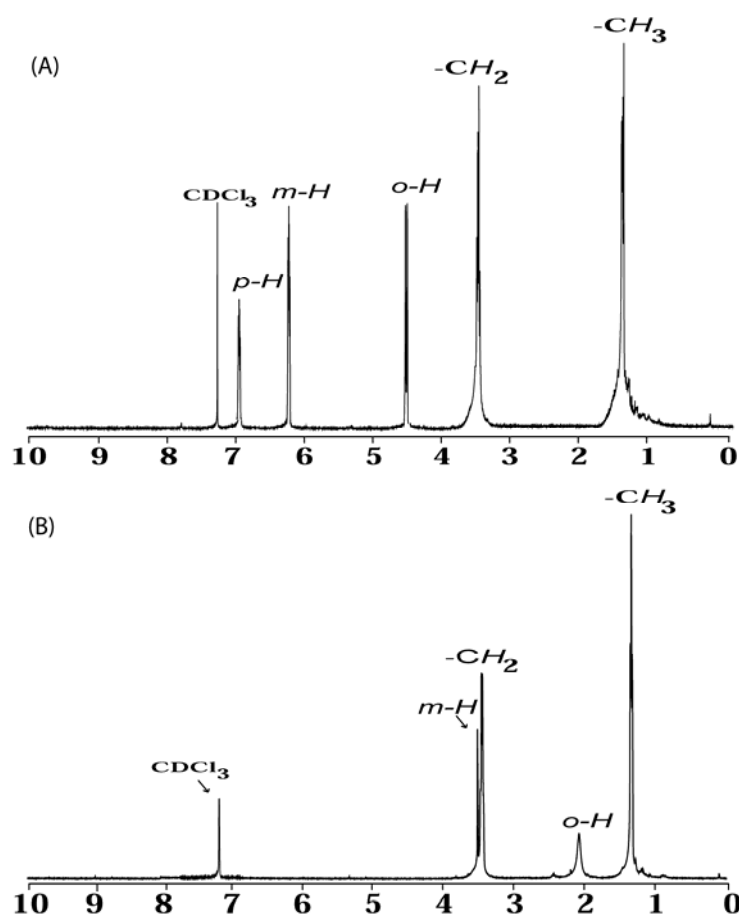

**Figure S4:**  $^1\text{H}$  NMR spectra in  $\text{CDCl}_3$  at 295K (A) for  $\text{Fe}^{\text{II}}(\text{tn-OEP})(\text{py})_2$  and (B) for  $\text{Fe}^{\text{II}}(\text{tn-OEP})(4\text{-CNpy})_2$

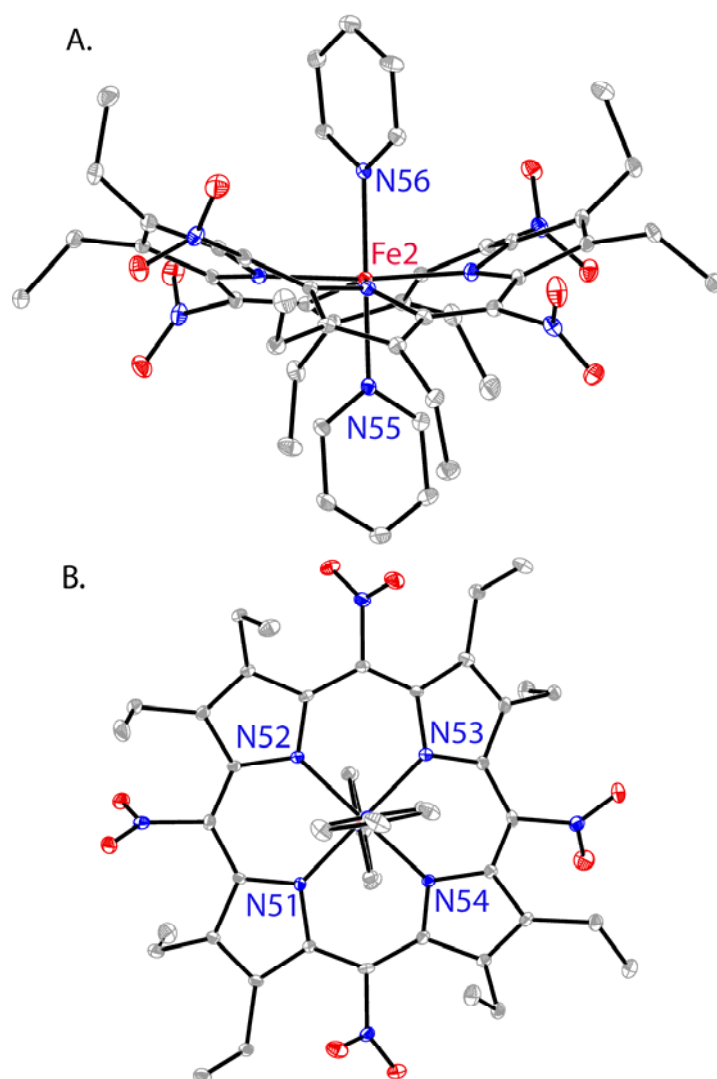

**Figure S5.** Two perspective views [A, side view; B, top view] for molecule 2 of Fe<sup>II</sup>(*m*-OEP)(py)<sub>2</sub> showing 50% thermal contours for all non-hydrogen atoms at 100K (H-atoms have been omitted for clarity).

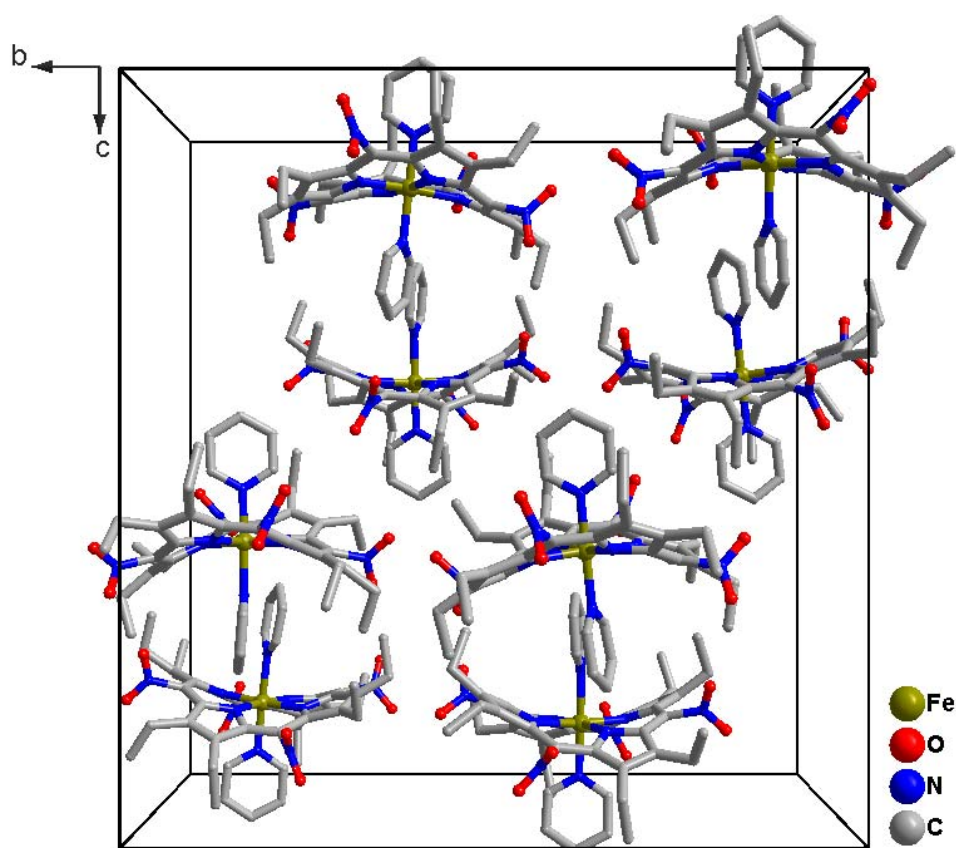

**Figure S6.** Diagram illustrating the packing of the  $\text{Fe}^{\text{II}}(\text{tn-OEP})(\text{py})_2$  molecules in the unit cell.

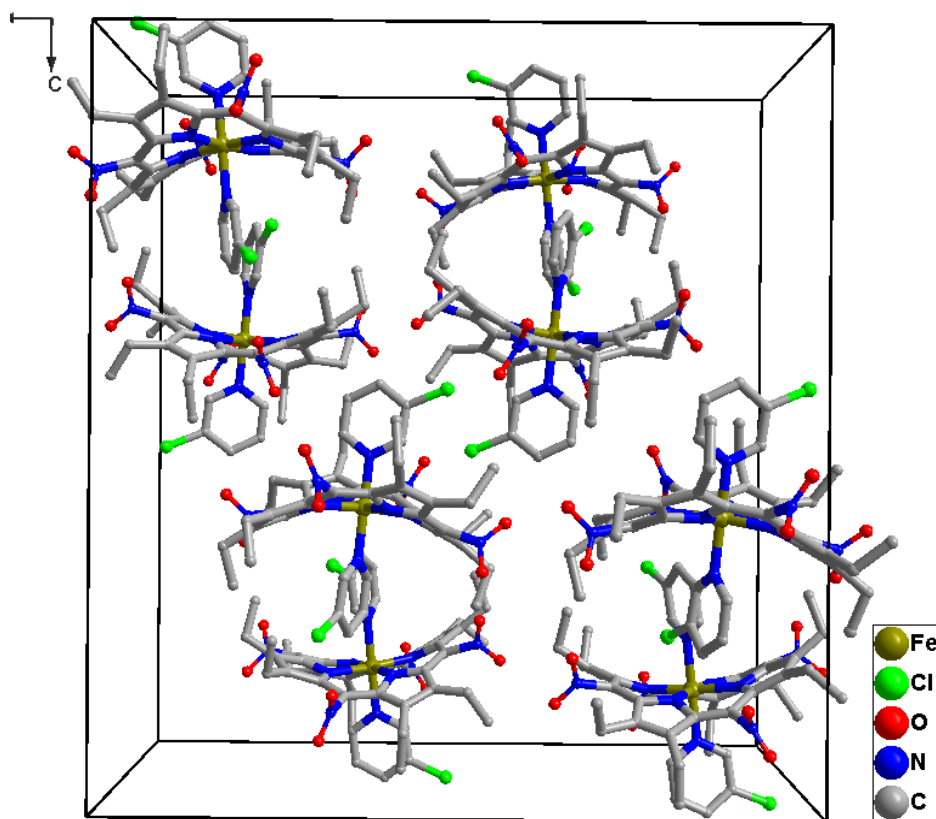

**Figure S7.** Diagram illustrating the packing of the  $\text{Fe}^{\text{II}}(\text{mn-OEP})(3\text{-Clpy})_2$  molecules in the unit cell.

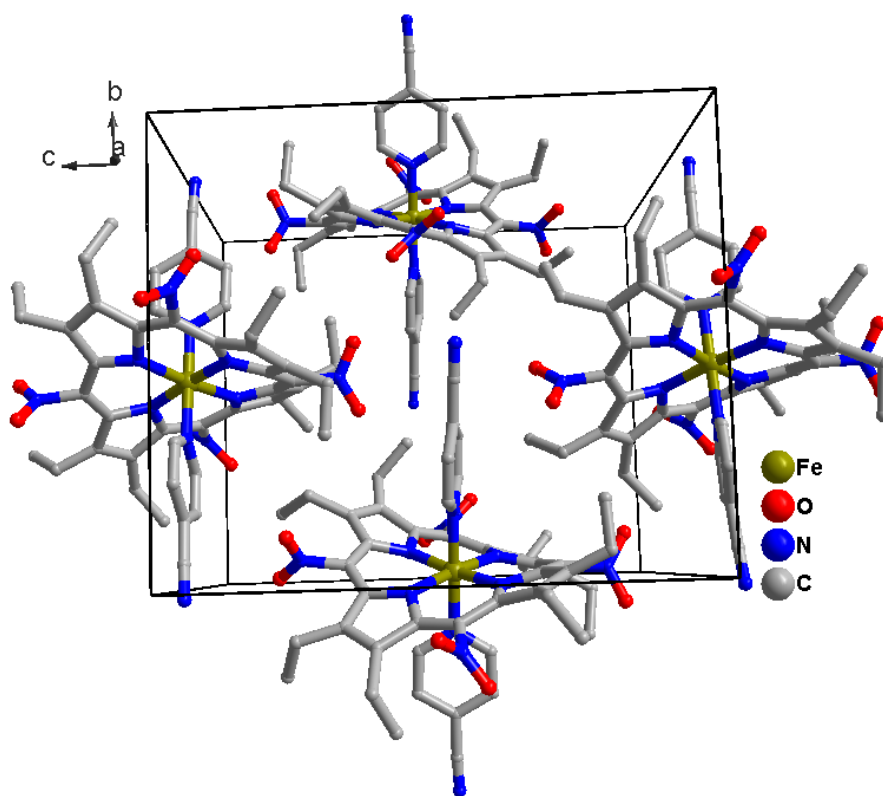

Figure S8. Diagram illustrating the packing of the  $\text{Fe}^{\text{II}}(\text{tn-OEP})(4\text{-CNpy})_2$  molecules in the unit cell.



**Table S1.** Crystal Data and Data Collection Parameters

|                                              | Fe <sup>II</sup> ( <i>tn</i> -OEP)(Py) <sub>2</sub>               | Fe <sup>II</sup> ( <i>tn</i> -OEP)(4-CNpy) <sub>2</sub>           | Fe <sup>II</sup> ( <i>tn</i> -OEP)(3-Clpy) <sub>2</sub>                           |
|----------------------------------------------|-------------------------------------------------------------------|-------------------------------------------------------------------|-----------------------------------------------------------------------------------|
| T, K                                         | 100(2)                                                            | 100(2)                                                            | 100(2)                                                                            |
| Formula                                      | C <sub>46</sub> H <sub>50</sub> Fe N <sub>10</sub> O <sub>8</sub> | C <sub>48</sub> H <sub>48</sub> Fe N <sub>12</sub> O <sub>8</sub> | C <sub>46</sub> H <sub>48</sub> Cl <sub>2</sub> Fe N <sub>10</sub> O <sub>8</sub> |
| Formula weight                               | 926.81                                                            | 976.83                                                            | 995.69                                                                            |
| Color and Habit                              | Dark green                                                        | Dark green                                                        | Dark green                                                                        |
| Crystal system                               | Orthorhombic                                                      | Monoclinic                                                        | Orthorhombic                                                                      |
| Space group                                  | P2(1)2(1)2(1)                                                     | P2(1)/c                                                           | Pbca                                                                              |
| a, Å                                         | 13.4183(11)                                                       | 19.4563(17)                                                       | 13.3561(10)                                                                       |
| b, Å                                         | 25.469(2)                                                         | 14.1225(12)                                                       | 25.439(2)                                                                         |
| c, Å                                         | 26.501(2)                                                         | 16.7267(14)                                                       | 27.699(2)                                                                         |
| α, deg                                       | 90                                                                | 90                                                                | 90                                                                                |
| β, deg                                       | 90                                                                | 93.694(2)                                                         | 90                                                                                |
| γ, deg                                       | 90                                                                | 90                                                                | 90                                                                                |
| V, Å <sup>3</sup>                            | 9056.9(13)                                                        | 4586.5(7)                                                         | 9411.1(13)                                                                        |
| Radiation (λ, Å)                             | Mo Kα                                                             | Mo Kα                                                             | Mo Kα                                                                             |
|                                              | (0.71073)                                                         | (0.71073)                                                         | (0.71073)                                                                         |
| Z                                            | 8                                                                 | 4                                                                 | 8                                                                                 |
| d <sub>calcd</sub> , g•cm <sup>-3</sup>      | 1.359                                                             | 1.415                                                             | 1.405                                                                             |
| μ, mm <sup>-1</sup>                          | 0.398                                                             | 0.398                                                             | 0.498                                                                             |
| F(000)                                       | 3888                                                              | 2040                                                              | 4144                                                                              |
| No. of unique data                           | 15904                                                             | 8767                                                              | 9247                                                                              |
| No. of restraints                            | 0                                                                 | 0                                                                 | 0                                                                                 |
| No. of params. Refined                       | 1188                                                              | 630                                                               | 622                                                                               |
| GOF on F <sup>2</sup>                        | 1.045                                                             | 1.021                                                             | 1.032                                                                             |
| R1 <sup>a</sup> [ <i>I</i> > 2σ( <i>I</i> )] | 0.0544                                                            | 0.0468                                                            | 0.0558                                                                            |
| R1 <sup>a</sup> (all data)                   | 0.0726                                                            | 0.0730                                                            | 0.0905                                                                            |
| wR2 <sup>b</sup> (all data)                  | 0.1288                                                            | 0.1219                                                            | 0.1381                                                                            |

$$^a R1 = \frac{\sum ||F_o| - |F_c||}{\sum |F_o|}; \quad ^b wR2 = \sqrt{\frac{\sum [w(F_o^2 - F_c^2)^2]}{\sum [w(F_o^2)^2]}}$$
